# Supplementary material for: Na3B4O7X (X = Cl, Br): two new borate halides with a 1D Na-X (X = Cl, Br) chain formed by the face-sharing XNa6octahedra
Source: Royal Society of Chemistry journal article supplement (doi:10.1039/c4ra16639f), 2015-01-01
Supplement: c4ra16639f1.pdf [file c4ra16639f1.pdf]

## Supporting Information

### **Na<sub>3</sub>B<sub>4</sub>O<sub>7</sub>X (X = Cl, Br): two new borate halides with 1D Na-X (X = Cl, Br) chain formed by the face-sharing XNa<sub>6</sub> octahedra**

Chunyan Bai<sup>a,b</sup>, Shujuan Han<sup>\*a</sup>, Shilie Pan<sup>\*a</sup>, Bingbing Zhang<sup>a,b</sup>, Yun Yang<sup>a</sup>, Lin Li<sup>a,b</sup>,

Zhijia Yang<sup>a</sup>

<sup>1</sup>Key Laboratory of Functional Materials and Devices for Special Environments of CAS, Xinjiang Key Laboratory of Electronic Information Materials and Devices, Xinjiang Technical Institute of Physics & Chemistry of CAS, 40-1 South Beijing Road, Urumqi 830011, China

<sup>2</sup>University of Chinese Academy of Sciences, Beijing 100049, China

To whom correspondence should be addressed.

E-mail: slpan@ms.xjb.ac.cn (Shilie Pan); hansj@ms.xjb.ac.cn (Shujuan Han)

Phone: (+86)991-3674558, Fax: (+86)991-3838957

**Table S1** Selected bond lengths (Å) and angles (deg.) for Na<sub>3</sub>B<sub>4</sub>O<sub>7</sub>Cl <sup>a</sup>.

|                      |            |                      |            |
|----------------------|------------|----------------------|------------|
| Na(1)-O(2)#1         | 2.406(6)   | Na(2)-Cl(1)#2        | 3.016(4)   |
| Na(1)-O(1)           | 2.442(6)   | Na(2)-Cl(1)          | 3.016(4)   |
| Na(1)-O(2)#2         | 2.443(5)   | B(1)-O(4)            | 1.441(8)   |
| Na(1)-Cl(1)          | 2.725(3)   | B(1)-O(1)            | 1.465(8)   |
| Na(1)-O(4)#2         | 2.940(6)   | B(1)-O(3)            | 1.477(8)   |
| Na(2)-O(3)#5         | 2.283(6)   | B(1)-O(2)            | 1.495(9)   |
| Na(2)-O(3)#3         | 2.283(6)   | B(2)-O(3)#3          | 1.347(8)   |
| Na(2)-O(4)#3         | 2.577(5)   | B(2)-O(4)#9          | 1.350(9)   |
| Na(2)-O(4)#5         | 2.577(5)   | B(2)-O(2)            | 1.386(9)   |
| O(2)#1-Na(1)-O(1)    | 73.44(14)  | O(3)#3-Na(2)-Cl(1)#2 | 162.32(14) |
| O(2)#1-Na(1)-O(2)#2  | 104.35(18) | O(4)#3-Na(2)-Cl(1)#2 | 105.75(13) |
| O(1)-Na(1)-O(2)#2    | 72.80(15)  | O(4)#5-Na(2)-Cl(1)#2 | 94.55(12)  |
| O(2)#1-Na(1)-Cl(1)   | 158.99(19) | O(3)#5-Na(2)-Cl(1)   | 162.32(14) |
| O(1)-Na(1)-Cl(1)     | 112.56(18) | O(3)#3-Na(2)-Cl(1)   | 100.05(12) |
| O(2)#2-Na(1)-Cl(1)   | 96.63(15)  | O(4)#3-Na(2)-Cl(1)   | 94.55(12)  |
| O(2)#1-Na(1)-O(4)#2  | 100.7(2)   | O(4)#5-Na(2)-Cl(1)   | 105.75(13) |
| O(1)-Na(1)-O(4)#2    | 120.28(17) | Cl(1)#2-Na(2)-Cl(1)  | 74.63(11)  |
| O(2)#2-Na(1)-O(4)#2  | 50.69(16)  | O(4)-B(1)-O(1)       | 115.3(5)   |
| Cl(1)-Na(1)-O(4)#2   | 93.44(14)  | O(4)-B(1)-O(3)       | 107.0(5)   |
| Na(1)#3-Na(1)-O(4)#2 | 75.57(12)  | O(1)-B(1)-O(3)       | 108.9(5)   |
| O(3)#5-Na(2)-O(3)#3  | 89.7(3)    | O(4)-B(1)-O(2)       | 106.2(5)   |
| O(3)#5-Na(2)-O(4)#3  | 103.1(2)   | O(1)-B(1)-O(2)       | 110.5(5)   |
| O(3)#3-Na(2)-O(4)#3  | 57.34(16)  | O(3)-B(1)-O(2)       | 108.8(5)   |
| O(3)#5-Na(2)-O(4)#5  | 57.34(16)  | O(3)#3-B(2)-O(4)#9   | 116.8(6)   |
| O(3)#3-Na(2)-O(4)#5  | 103.1(2)   | O(3)#3-B(2)-O(2)     | 122.0(6)   |
| O(4)#3-Na(2)-O(4)#5  | 154.5(3)   | O(4)#9-B(2)-O(2)     | 121.2(6)   |
| O(3)#5-Na(2)-Cl(1)#2 | 100.05(13) |                      |            |

<sup>a</sup> Symmetry transformations used to generate equivalent atoms:

#1 x-y, -y+1, -z+1, #2 y, -x+y+1, z+1/6, #3 -y+1, -x+1, -z+7/6, #4 x-y+1, -y+2, -z+1, #5 y+1, -x+y+1, z+1/6,

#9 x-y+1, -y+1, -z+1

**Table S2** Selected bond lengths (Å) and angles (deg.) for Na<sub>3</sub>B<sub>4</sub>O<sub>7</sub>Br <sup>a</sup>.

|                       |            |                      |            |
|-----------------------|------------|----------------------|------------|
| Na(1)-O(2)#1          | 2.387(4)   | Na(2)-Br(1)          | 3.145(4)   |
| Na(1)-O(1)            | 2.449(5)   | Na(2)-Br(1)#8        | 3.145(4)   |
| Na(1)-O(2)#2          | 2.449(5)   | B(1)-O(4)#10         | 1.356(6)   |
| Na(1)-Br(1)#3         | 2.822(3)   | B(1)-O(2)            | 1.366(7)   |
| Na(1)-O(4)#2          | 2.928(5)   | B(1)-O(3)#4          | 1.370(7)   |
| Na(1)-Br(1)#5         | 3.346(4)   | B(2)-O(4)            | 1.451(6)   |
| Na(2)-O(3)#7          | 2.282(5)   | B(2)-O(1)            | 1.456(6)   |
| Na(2)-O(3)            | 2.282(5)   | B(2)-O(3)            | 1.483(6)   |
| Na(2)-O(4)            | 2.659(4)   | B(2)-O(2)            | 1.501(6)   |
| Na(2)-O(4)#7          | 2.659(4)   | O(3)-Na(2)-O(4)#7    | 105.90(16) |
| O(2)#1-Na(1)-O(1)     | 74.20(12)  | O(4)-Na(2)-O(4)#7    | 156.6(2)   |
| O(2)#1-Na(1)-O(2)#2   | 105.80(15) | O(3)#7-Na(2)-Br(1)   | 160.97(11) |
| O(1)-Na(1)-O(2)#2     | 73.13(11)  | O(3)-Na(2)-Br(1)     | 100.35(11) |
| O(2)#1-Na(1)-Br(1)#3  | 160.45(14) | O(4)-Na(2)-Br(1)     | 93.02(10)  |
| O(1)-Na(1)-Br(1)#3    | 112.54(12) | O(4)#7-Na(2)-Br(1)   | 106.04(10) |
| O(2)#2-Na(1)-Br(1)#3  | 93.75(12)  | O(3)#7-Na(2)-Br(1)#8 | 100.35(11) |
| O(2)#1-Na(1)-O(4)#2   | 102.49(16) | O(3)-Na(2)-Br(1)#8   | 160.97(11) |
| O(1)-Na(1)-O(4)#2     | 121.54(14) | O(4)-Na(2)-Br(1)#8   | 106.04(10) |
| O(2)#2-Na(1)-O(4)#2   | 51.17(13)  | O(4)#7-Na(2)-Br(1)#8 | 93.02(10)  |
| Br(1)#3-Na(1)-O(4)#2  | 89.64(10)  | Br(1)-Na(2)-Br(1)#8  | 71.78(11)  |
| O(2)#1-Na(1)-Br(1)#5  | 88.08(13)  | O(4)#10-B(1)-O(2)    | 122.8(5)   |
| O(1)-Na(1)-Br(1)#5    | 99.61(11)  | O(4)#10-B(1)-O(3)#4  | 116.0(4)   |
| O(2)#2-Na(1)-Br(1)#5  | 161.36(15) | O(2)-B(1)-O(3)#4     | 121.2(4)   |
| Br(1)#3-Na(1)-Br(1)#5 | 72.86(8)   | O(4)-B(2)-O(1)       | 115.5(4)   |
| O(4)#2-Na(1)-Br(1)#5  | 138.84(11) | O(4)-B(2)-O(3)       | 106.6(4)   |
| O(3)#7-Na(2)-O(3)     | 92.0(2)    | O(1)-B(2)-O(3)       | 109.5(4)   |
| O(3)#7-Na(2)-O(4)     | 105.90(16) | O(4)-B(2)-O(2)       | 106.3(4)   |
| O(3)-Na(2)-O(4)       | 56.22(12)  | O(1)-B(2)-O(2)       | 110.9(4)   |
| O(3)#7-Na(2)-O(4)#7   | 56.22(12)  | O(3)-B(2)-O(2)       | 107.8(4)   |

<sup>a</sup> Symmetry transformations used to generate equivalent atoms:

#1 x-y+1, -y+1, -z, #2 y, -x+y, z+1/6, #3 x-1, y-1, z, #5 x-y, x-1, z-1/6, #7 x-y+1, -y+2, -z, #8 x-y+1, x, z-1/6,

#9 y, -x+y+1, z+1/6, #10 x-y, -y+1, -z

**Table S3** The element analysis of  $\text{Na}_3\text{B}_4\text{O}_7\text{X}$  ( $\text{X} = \text{Cl}, \text{Br}$ ).

| Element | $\text{Na}_3\text{B}_4\text{O}_7\text{Cl}$ |       | $\text{Na}_3\text{B}_4\text{O}_7\text{Br}$ |       |
|---------|--------------------------------------------|-------|--------------------------------------------|-------|
|         | Cal.                                       | Exp.  | Cal.                                       | Exp.  |
| Na      | 26.56                                      | 26.71 | 22.68                                      | 22.82 |
| B       | 16.65                                      | 16.75 | 14.22                                      | 14.34 |

**Table S4** The assignment of infrared spectra for Na<sub>3</sub>B<sub>4</sub>O<sub>7</sub>X (X = Cl, Br).

| Na <sub>3</sub> B <sub>4</sub> O <sub>7</sub> Cl<br>(cm <sup>-1</sup> ) | Na <sub>3</sub> B <sub>4</sub> O <sub>7</sub> Br<br>(cm <sup>-1</sup> ) | Assignment                                          |
|-------------------------------------------------------------------------|-------------------------------------------------------------------------|-----------------------------------------------------|
| 1338                                                                    | 1346                                                                    | asymmetric stretching vibrations of BO <sub>3</sub> |
| 1140                                                                    | 1140                                                                    | asymmetric stretching vibrations of BO <sub>4</sub> |
| 950                                                                     | 950                                                                     | symmetric stretching vibrations of BO <sub>3</sub>  |
| 853, 808, 753                                                           | 862, 807, 763                                                           | symmetric stretching vibrations of BO <sub>4</sub>  |
| 654                                                                     | 663                                                                     | out-of-plane bending of BO <sub>3</sub>             |
| 519                                                                     | 520                                                                     | bending of BO <sub>3</sub> and BO <sub>4</sub>      |
| 465                                                                     | 475                                                                     | bending of BO <sub>4</sub>                          |

**Captions for Figures:**

**Figure S1.** Infrared spectra of  $\text{Na}_3\text{B}_4\text{O}_7\text{X}$  ( $\text{X} = \text{Cl}, \text{Br}$ ).

**Figure S2.** The coordination environments of the cations in  $\text{Na}_3\text{B}_4\text{O}_7\text{Br}$ .

**Figure S3.** The boron-oxygen framework in the crystal structure of  $\text{Na}_3\text{B}_4\text{O}_7\text{Br}$  in *bc* plane ( $\text{BO}_3$  triangles and  $\text{BO}_4$  tetrahedra are shown in rose and green, respectively).

**Figure S4.** UV–Vis–NIR diffuse-reflectance spectra of  $\text{Na}_3\text{B}_4\text{O}_7\text{X}$  ( $\text{X} = \text{Cl}, \text{Br}$ ).

**Figure S5.** Calculated band structure of  $\text{Na}_3\text{B}_4\text{O}_7\text{Br}$ .

**Figure S6.** The total and partial densities of states of  $\text{Na}_3\text{B}_4\text{O}_7\text{Br}$ .

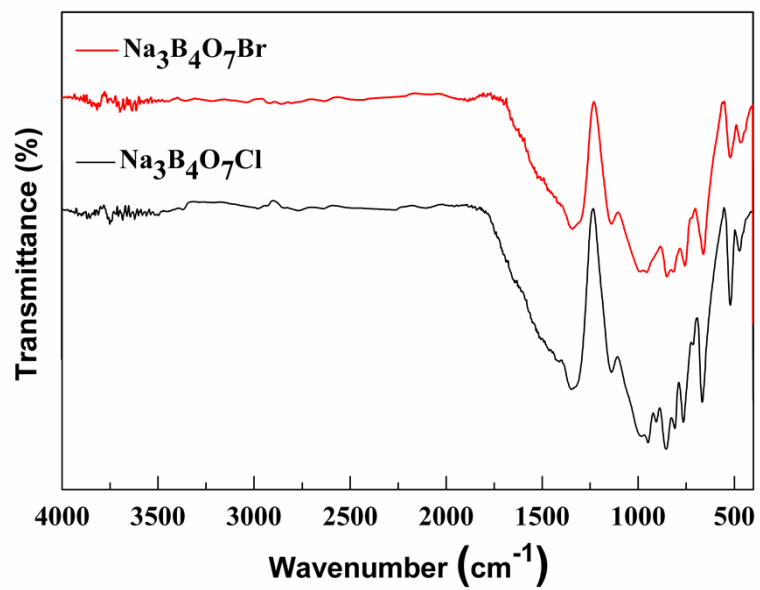

**Figure S1.** Infrared spectra of  $\text{Na}_3\text{B}_4\text{O}_7\text{X}$  ( $\text{X} = \text{Cl}, \text{Br}$ ).

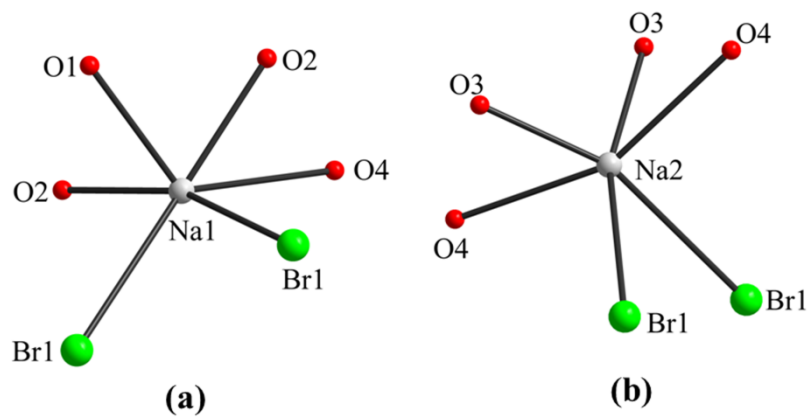

**Figure S2.** The coordination environments of the cations in  $\text{Na}_3\text{B}_4\text{O}_7\text{Br}$ .



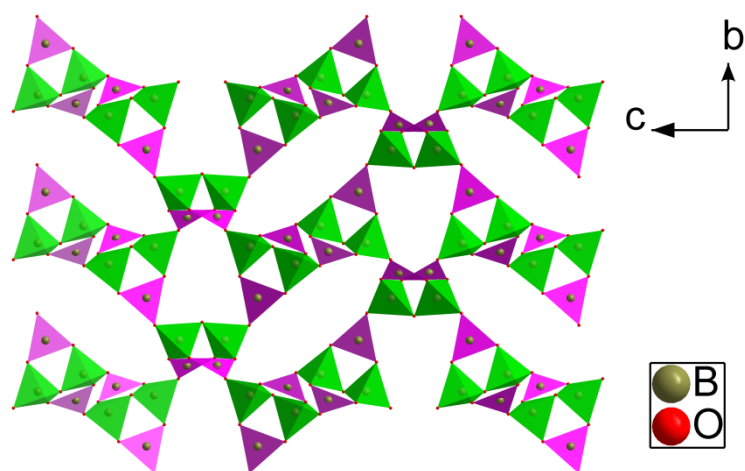

**Figure S3.** The boron-oxygen framework in the crystal structure of  $\text{Na}_3\text{B}_4\text{O}_7\text{Br}$  in  $bc$  plane ( $\text{BO}_3$  triangles and  $\text{BO}_4$  tetrahedra are shown in rose and green, respectively).

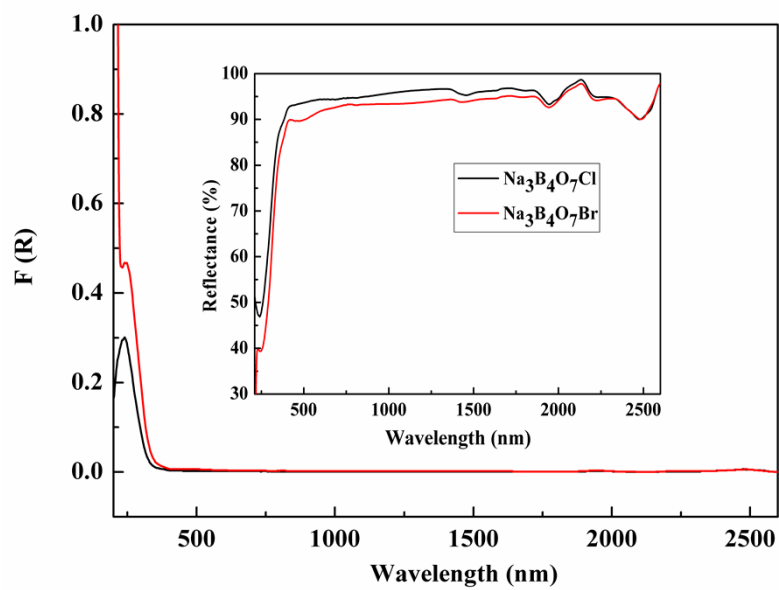

**Figure S4.** UV-Vis-NIR diffuse-reflectance spectra of  $\text{Na}_3\text{B}_4\text{O}_7\text{X}$  ( $\text{X} = \text{Cl}, \text{Br}$ ).

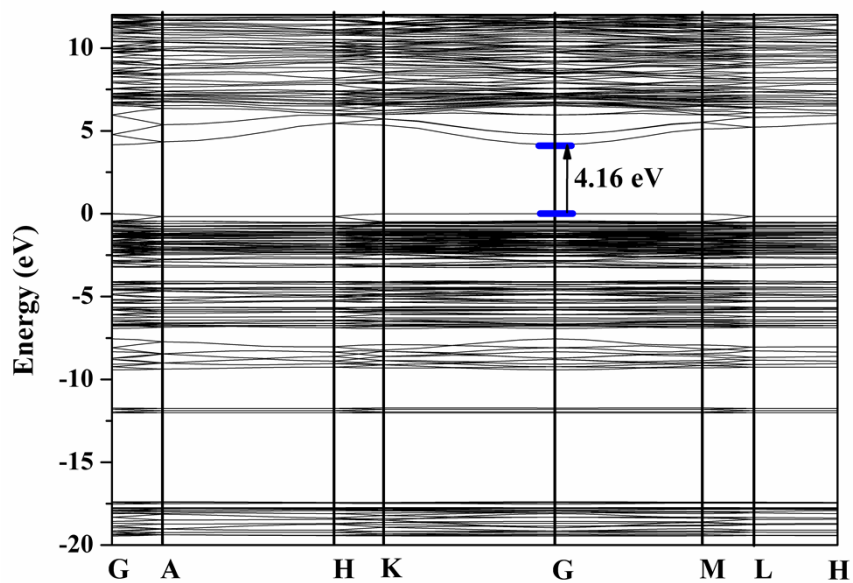

**Figure S5.** Calculated band structure of Na<sub>3</sub>B<sub>4</sub>O<sub>7</sub>Br.

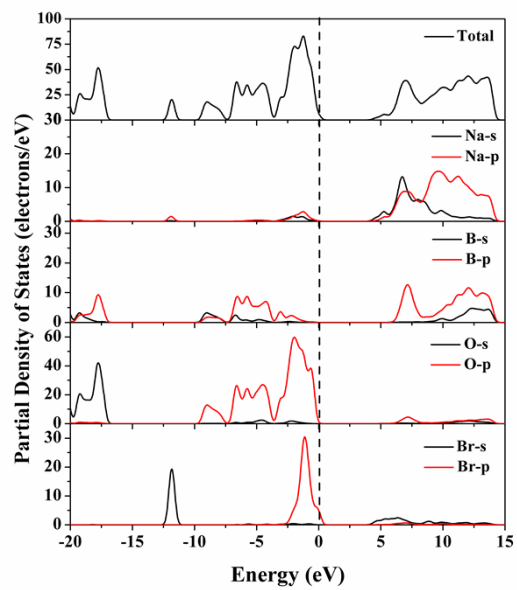

**Figure S6.** The total and partial densities of states of Na<sub>3</sub>B<sub>4</sub>O<sub>7</sub>Br.
